# Supplementary material for: Copy number variation in the human Y chromosome in the UK population
Source: PubMed Central journal article supplement (PMC4460274; doi:10.1007/s00439-015-1562-5), 2015-05-10

chrY (p11.31-p11.2) | p11.32 | Yp11.2 | Yq11.221 | 11.222 | Yq11.223 | Yq11.23 | Yq12

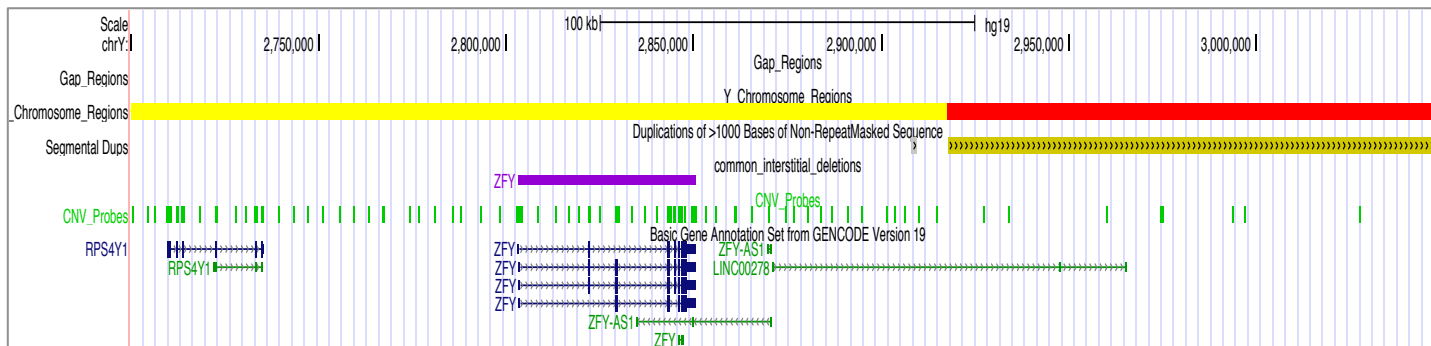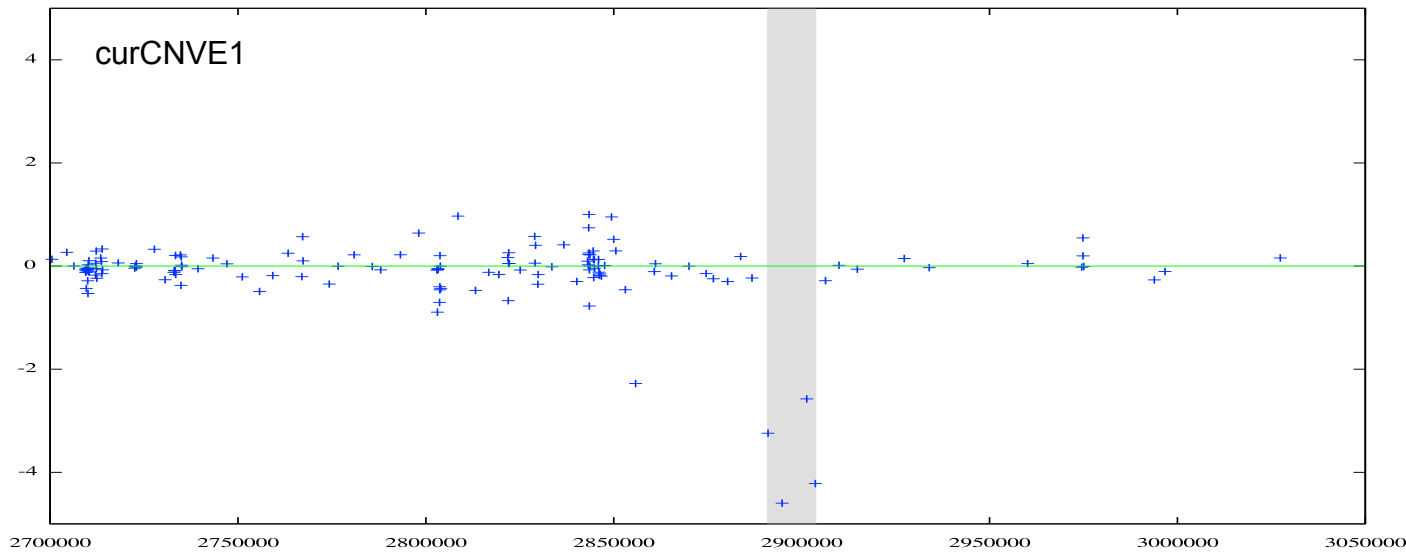

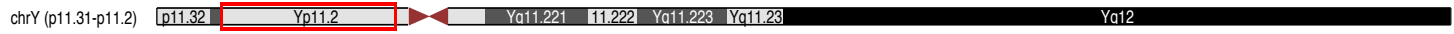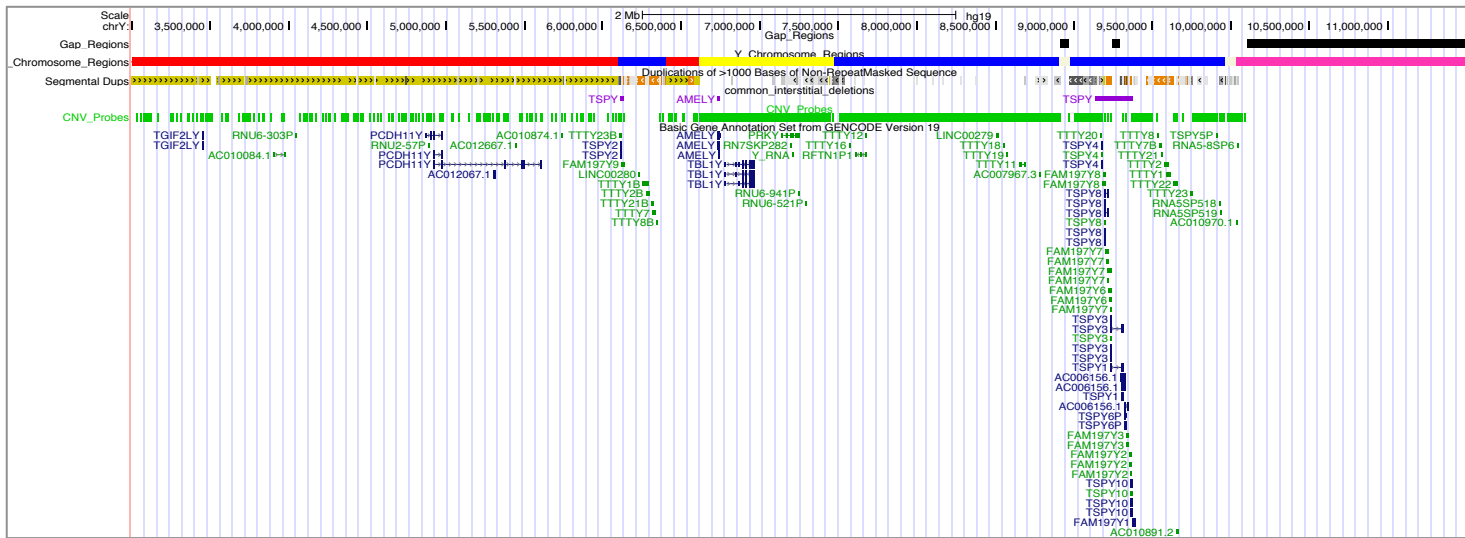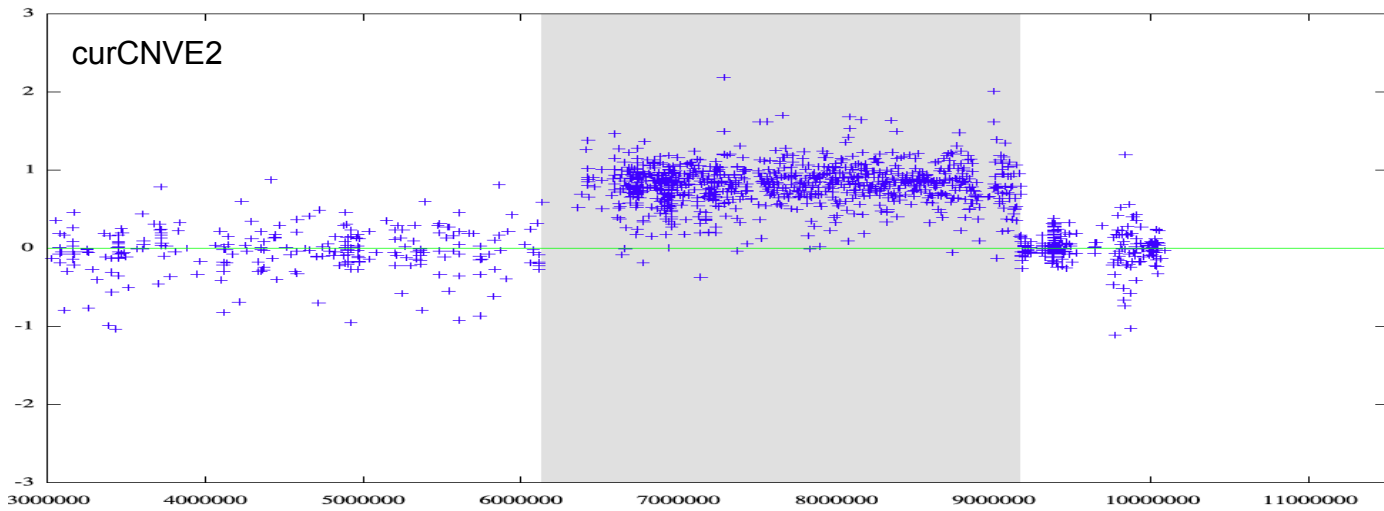







# TSPY Region

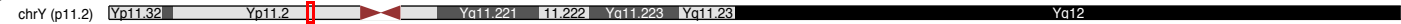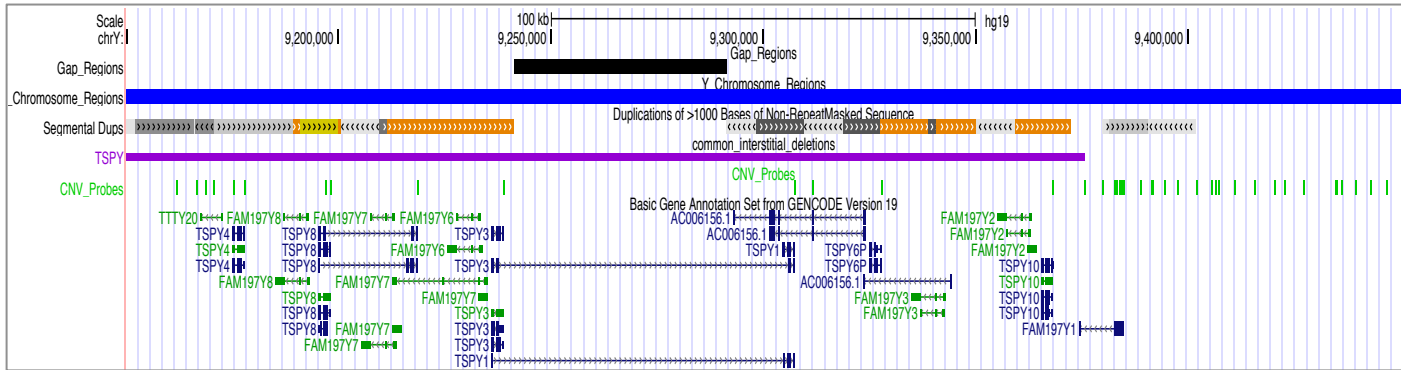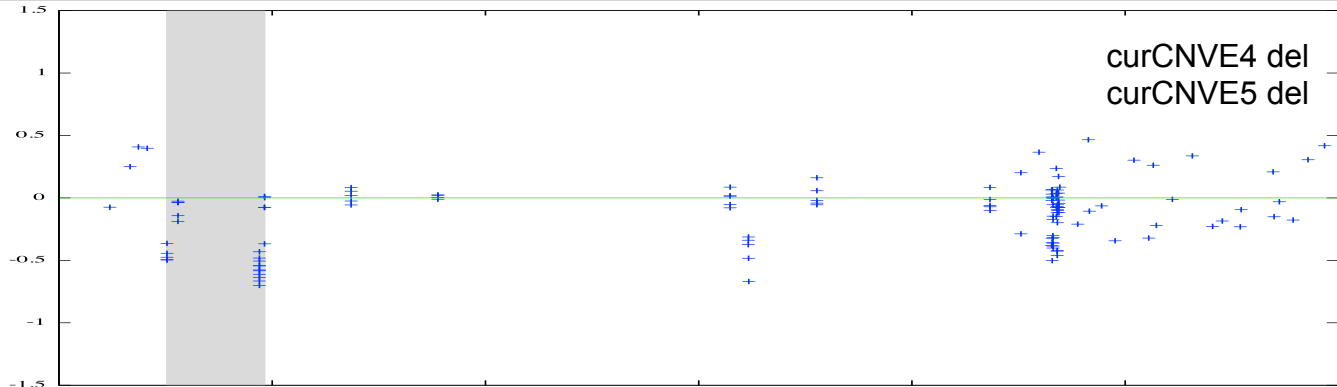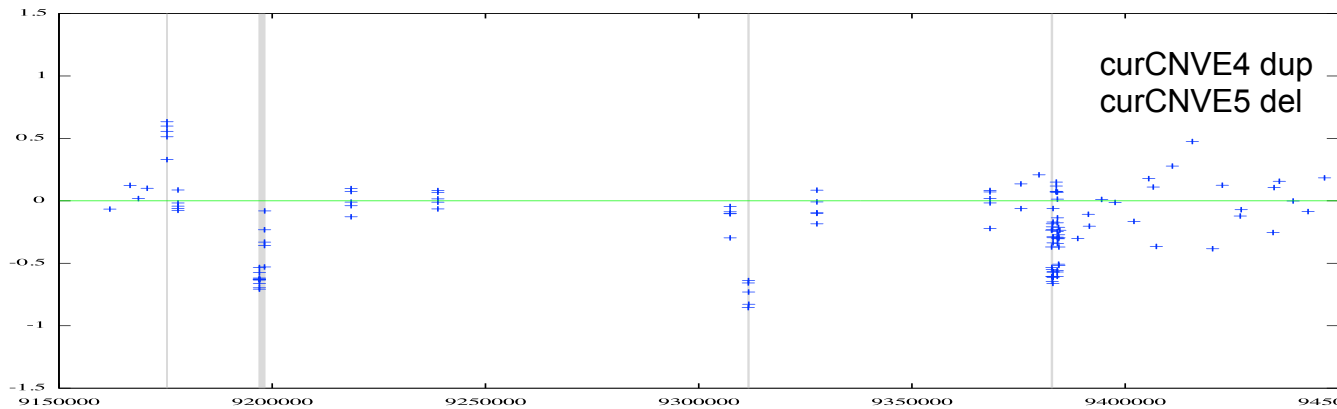

# TSPY Region

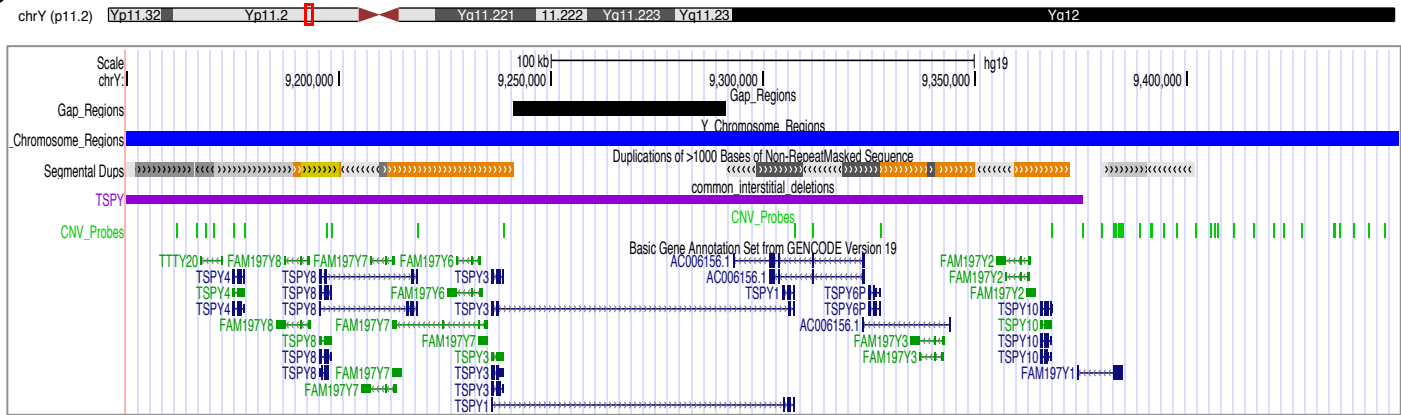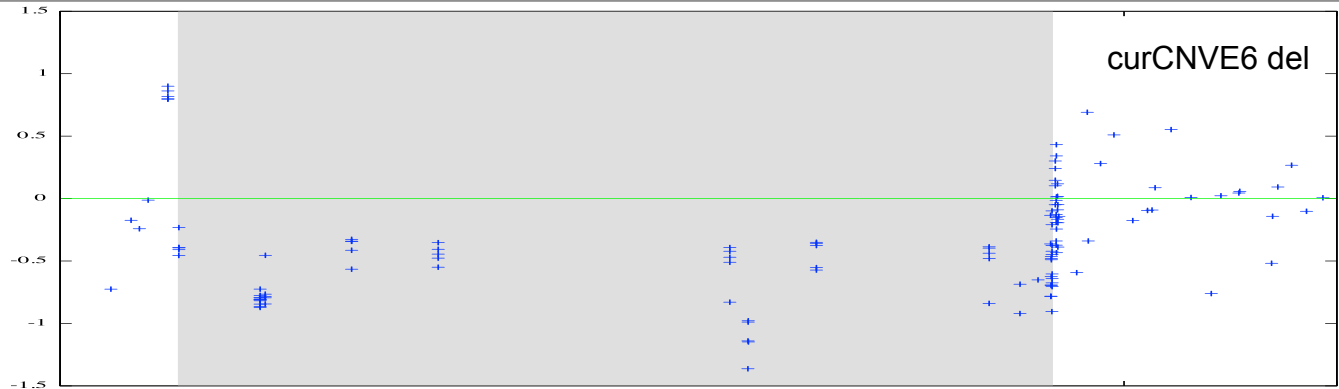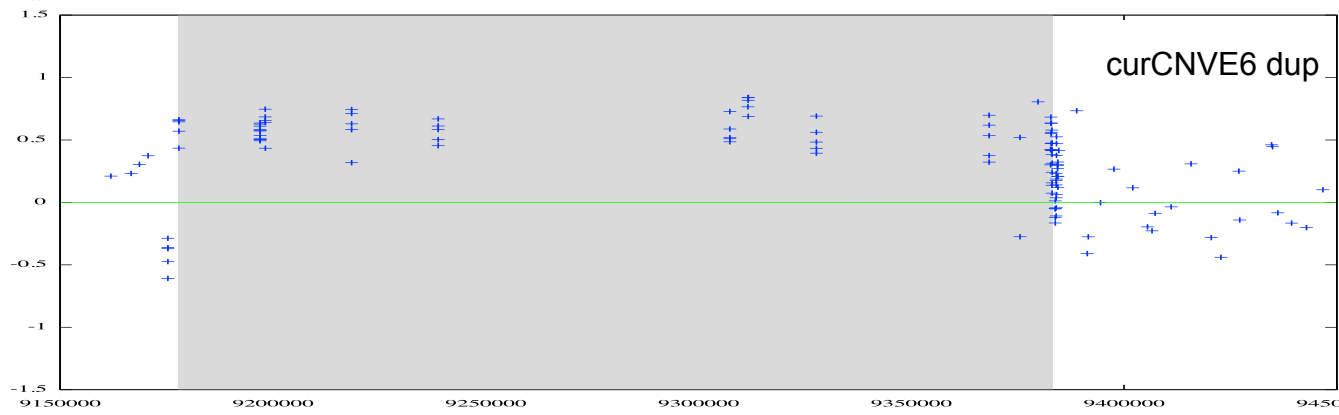

9150000 9200000 9250000 9300000 9350000 9400000 9450000

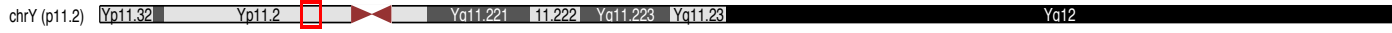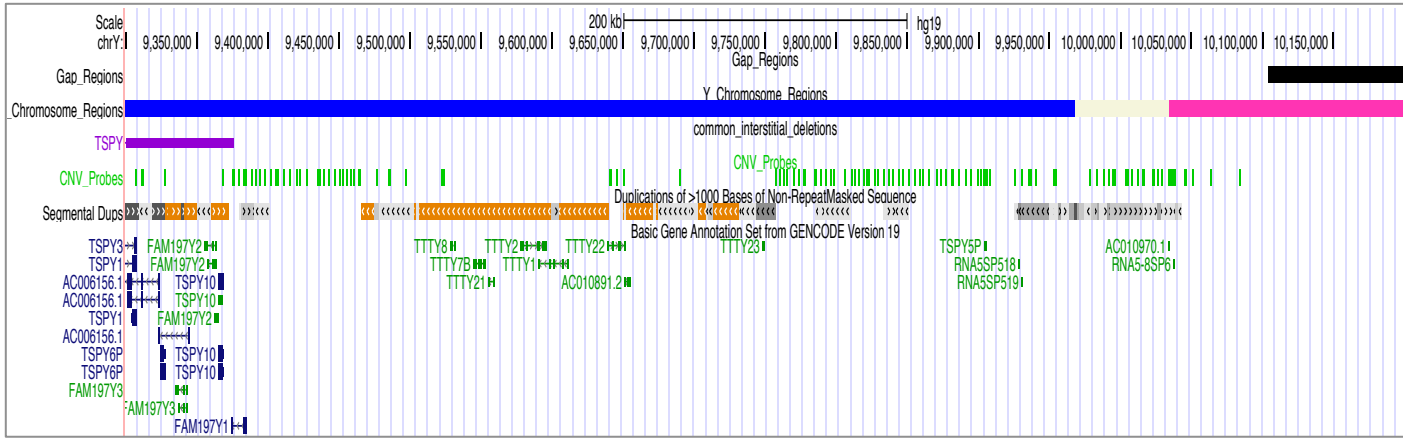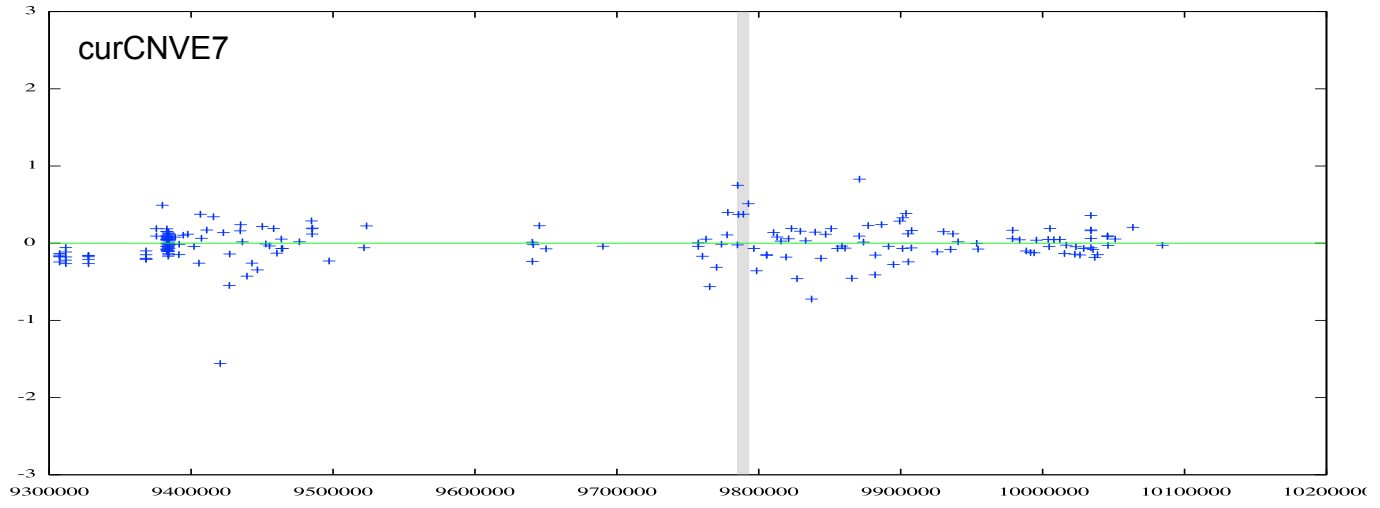



chrY (q11.21-q11.221) p11.32 Yp11.2 Yq11.221 Yq11.222 Yq11.223 Yq11.23 Yq12

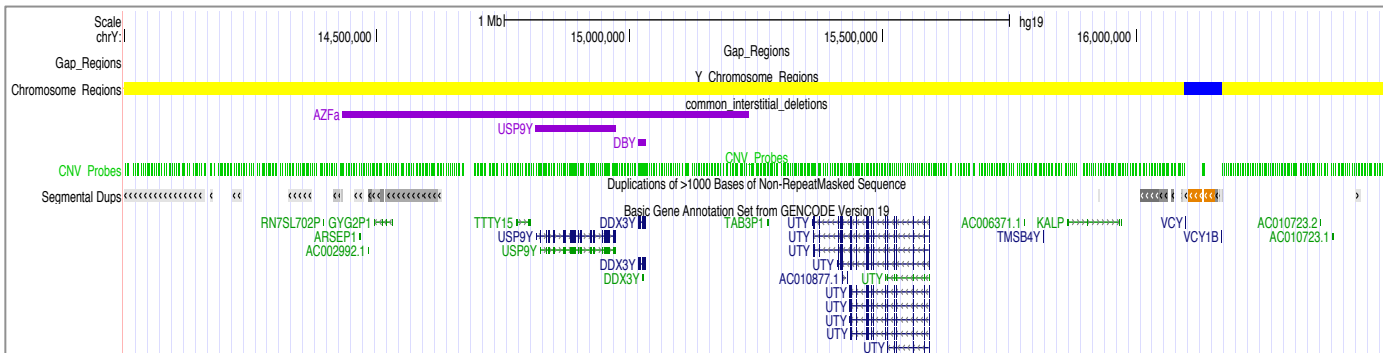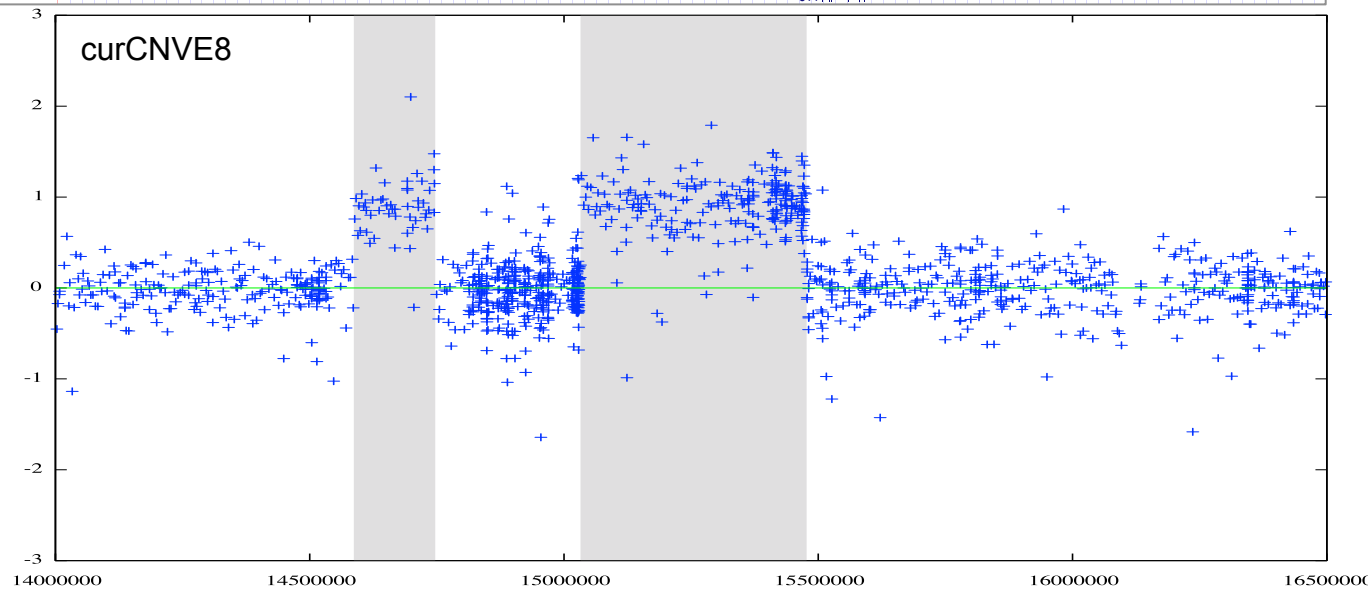

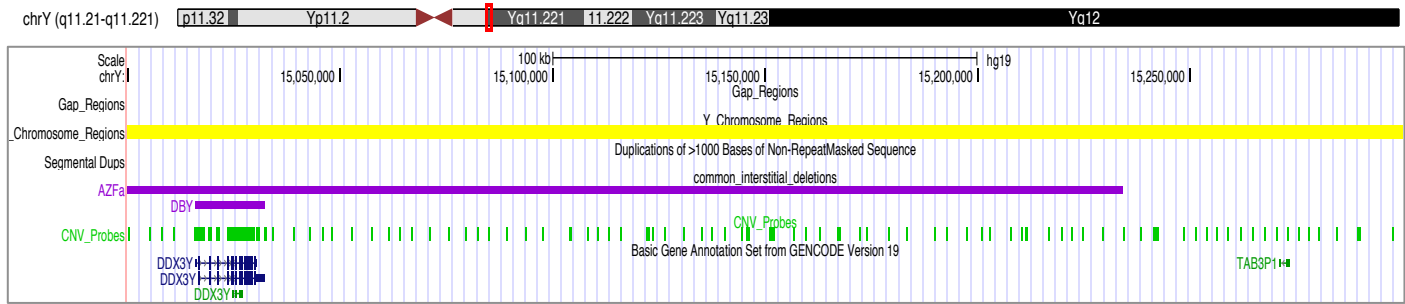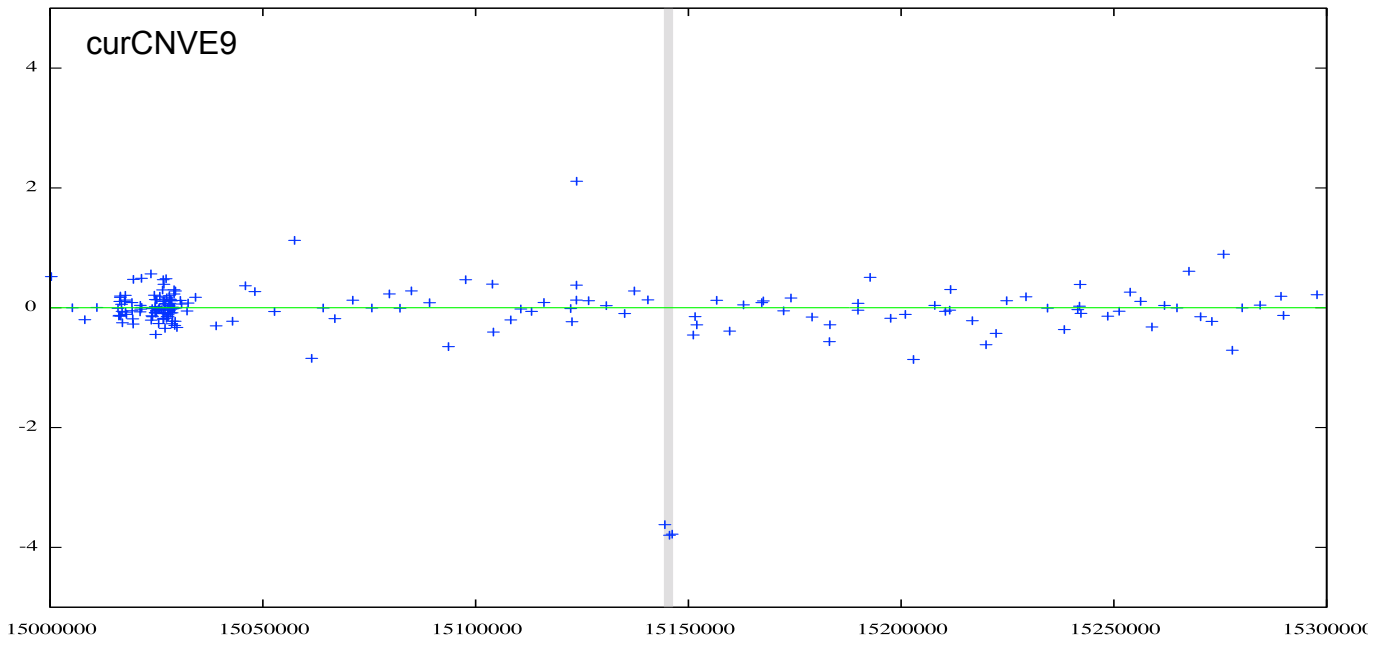



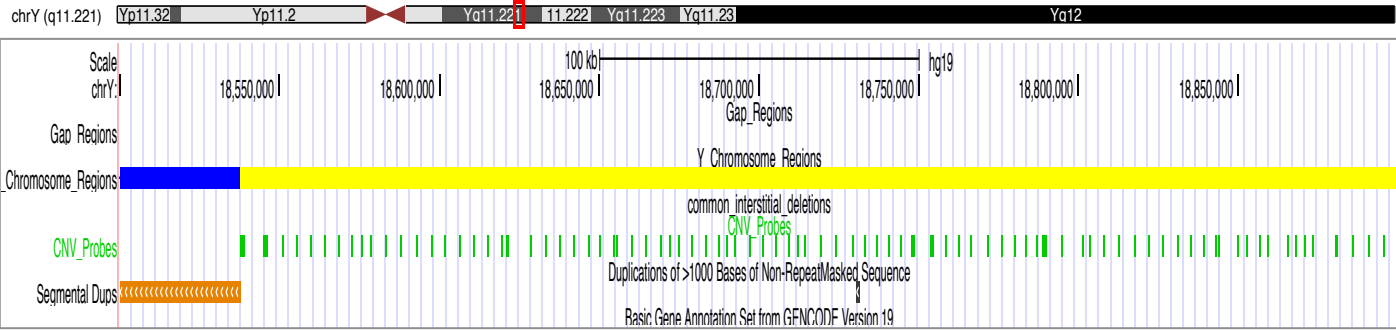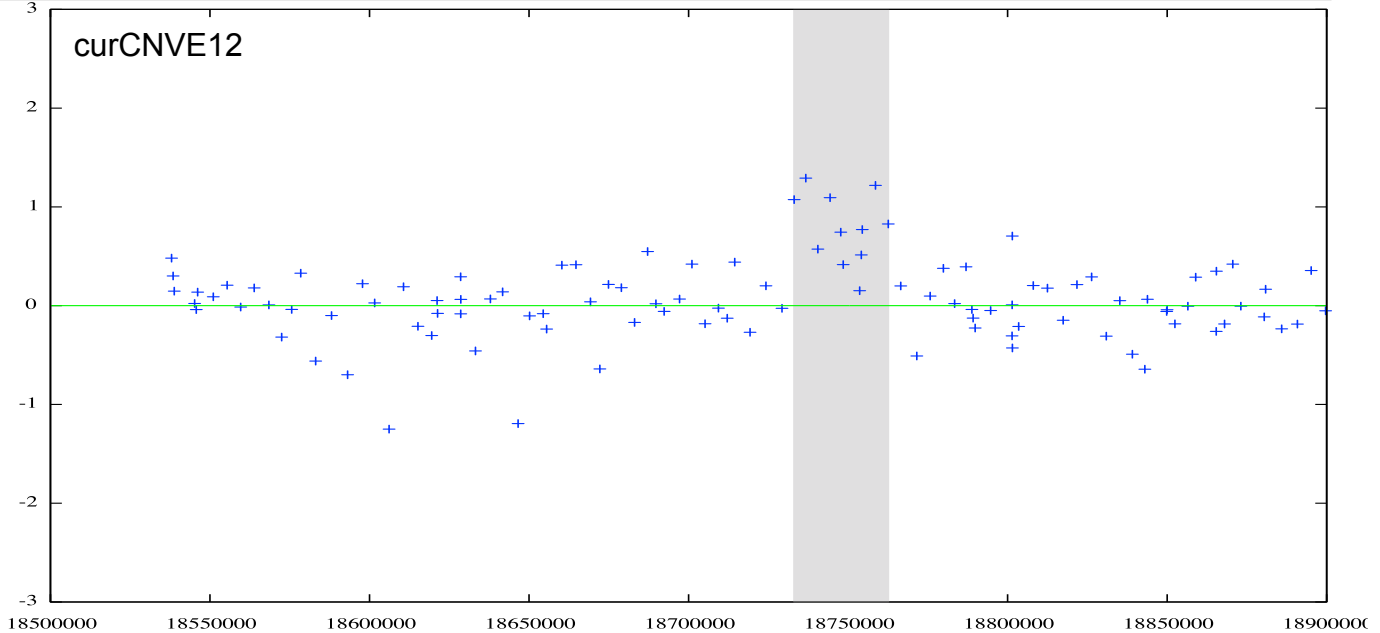

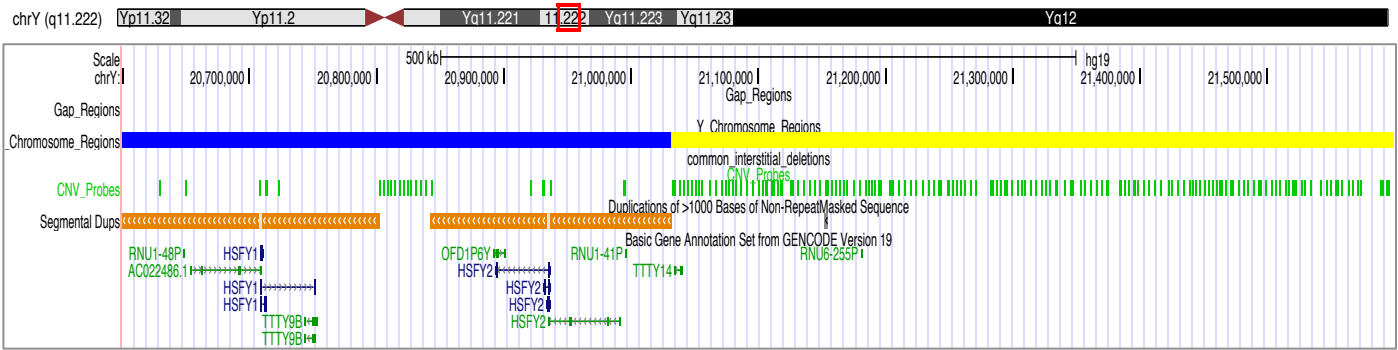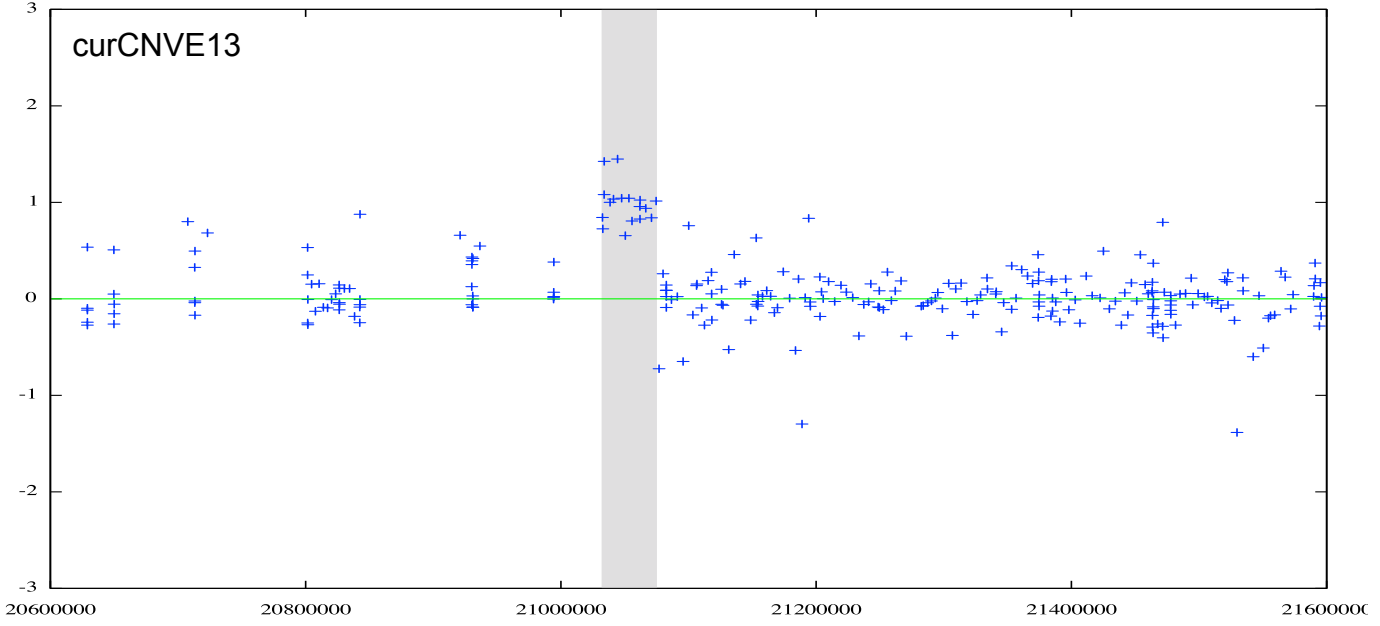









# RBMV Region

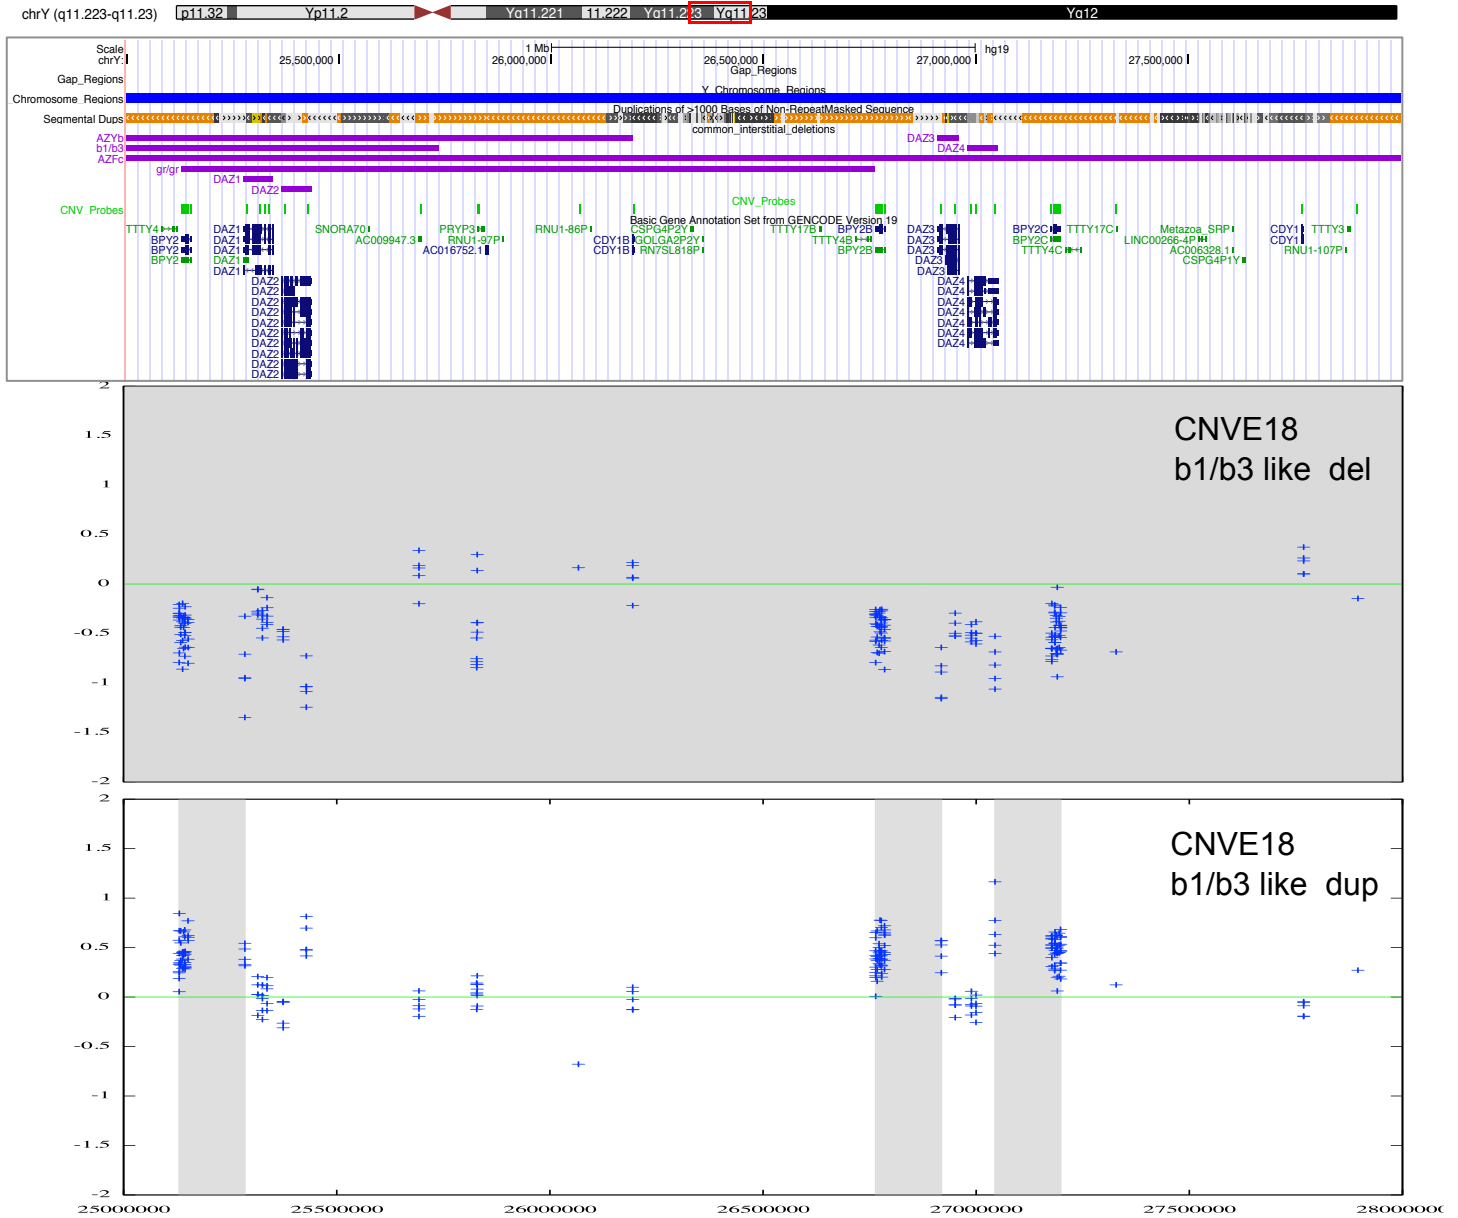





# DAZ Region

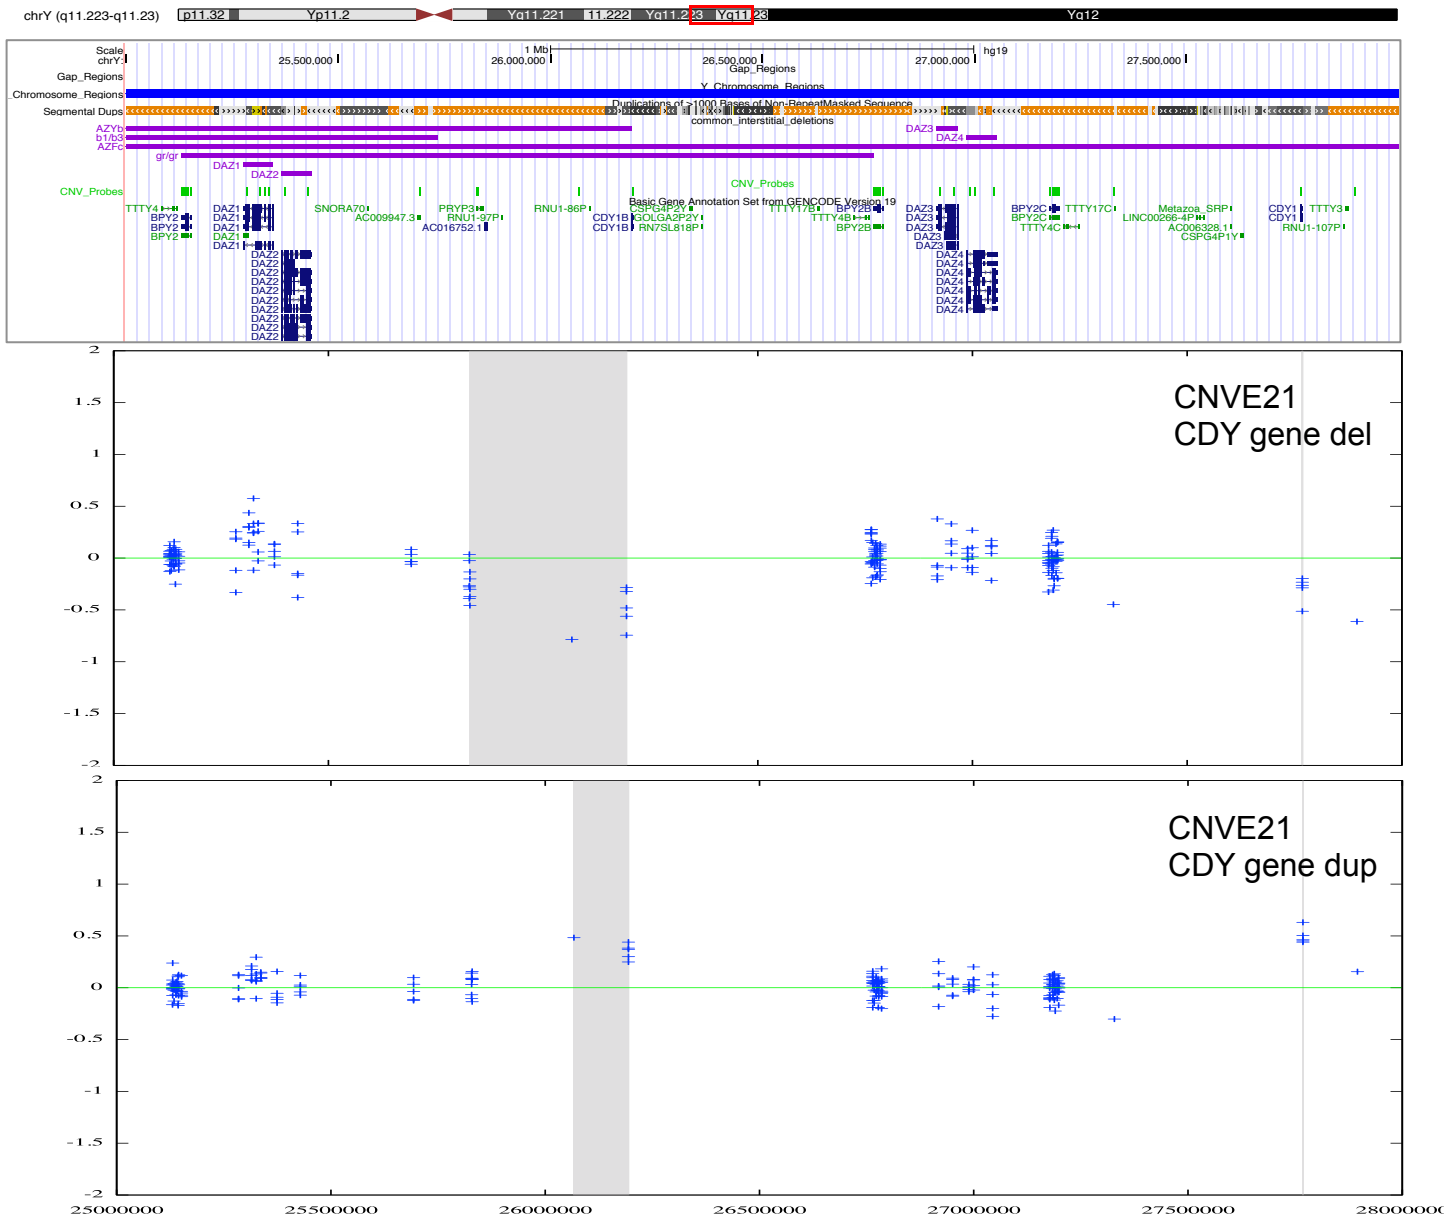

chrY (q11.23-q12) Yp11.32 Yp11.2 Ya11.221 11.222 Ya11.223 Yq11.23 Yq12

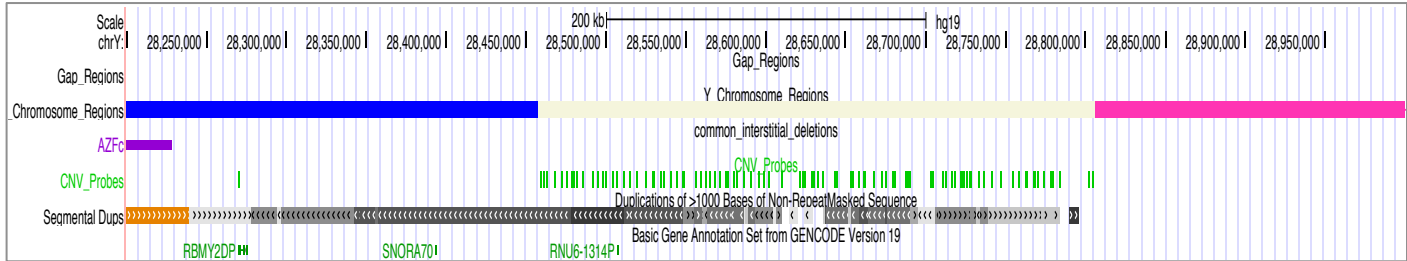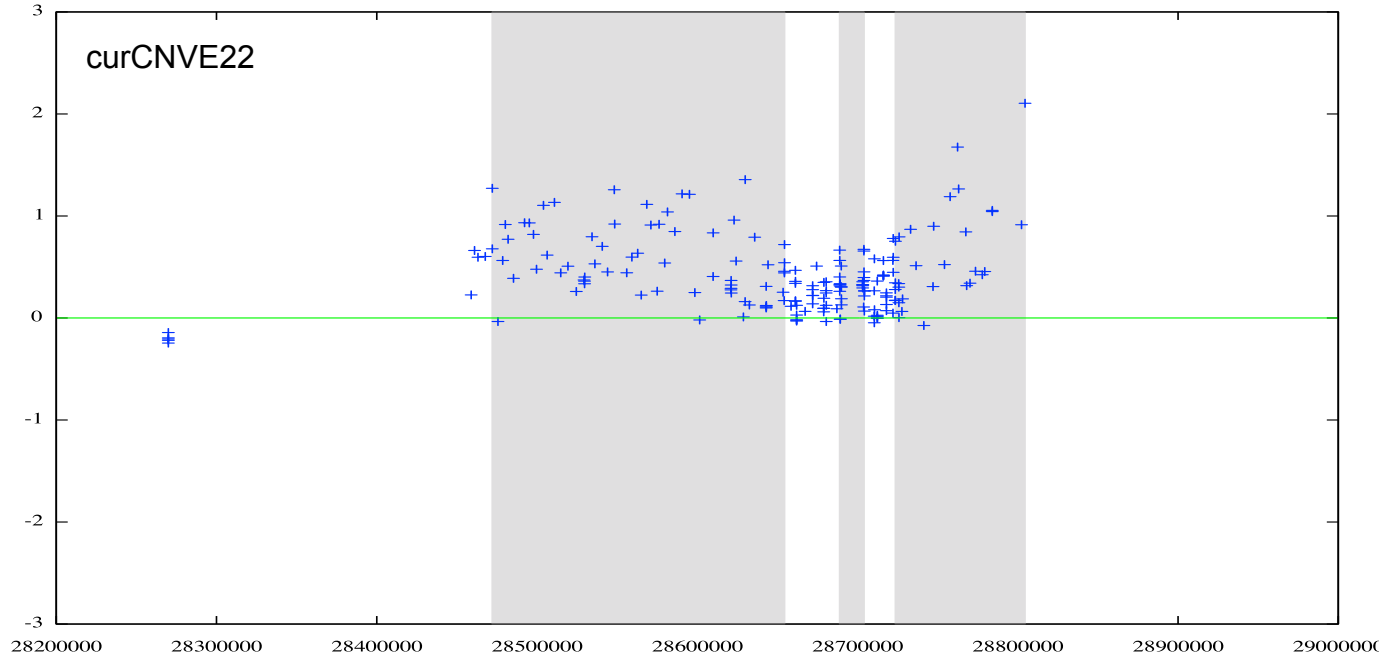

Supplement: 439_2015_1562_MOESM1_ESM.pdf [file 439_2015_1562_MOESM1_ESM.pdf]
