# Supplementary material for: Copy number variation in the human Y chromosome in the UK population
Source: PubMed Central journal article supplement (PMC4460274; doi:10.1007/s00439-015-1562-5), 2015-05-10

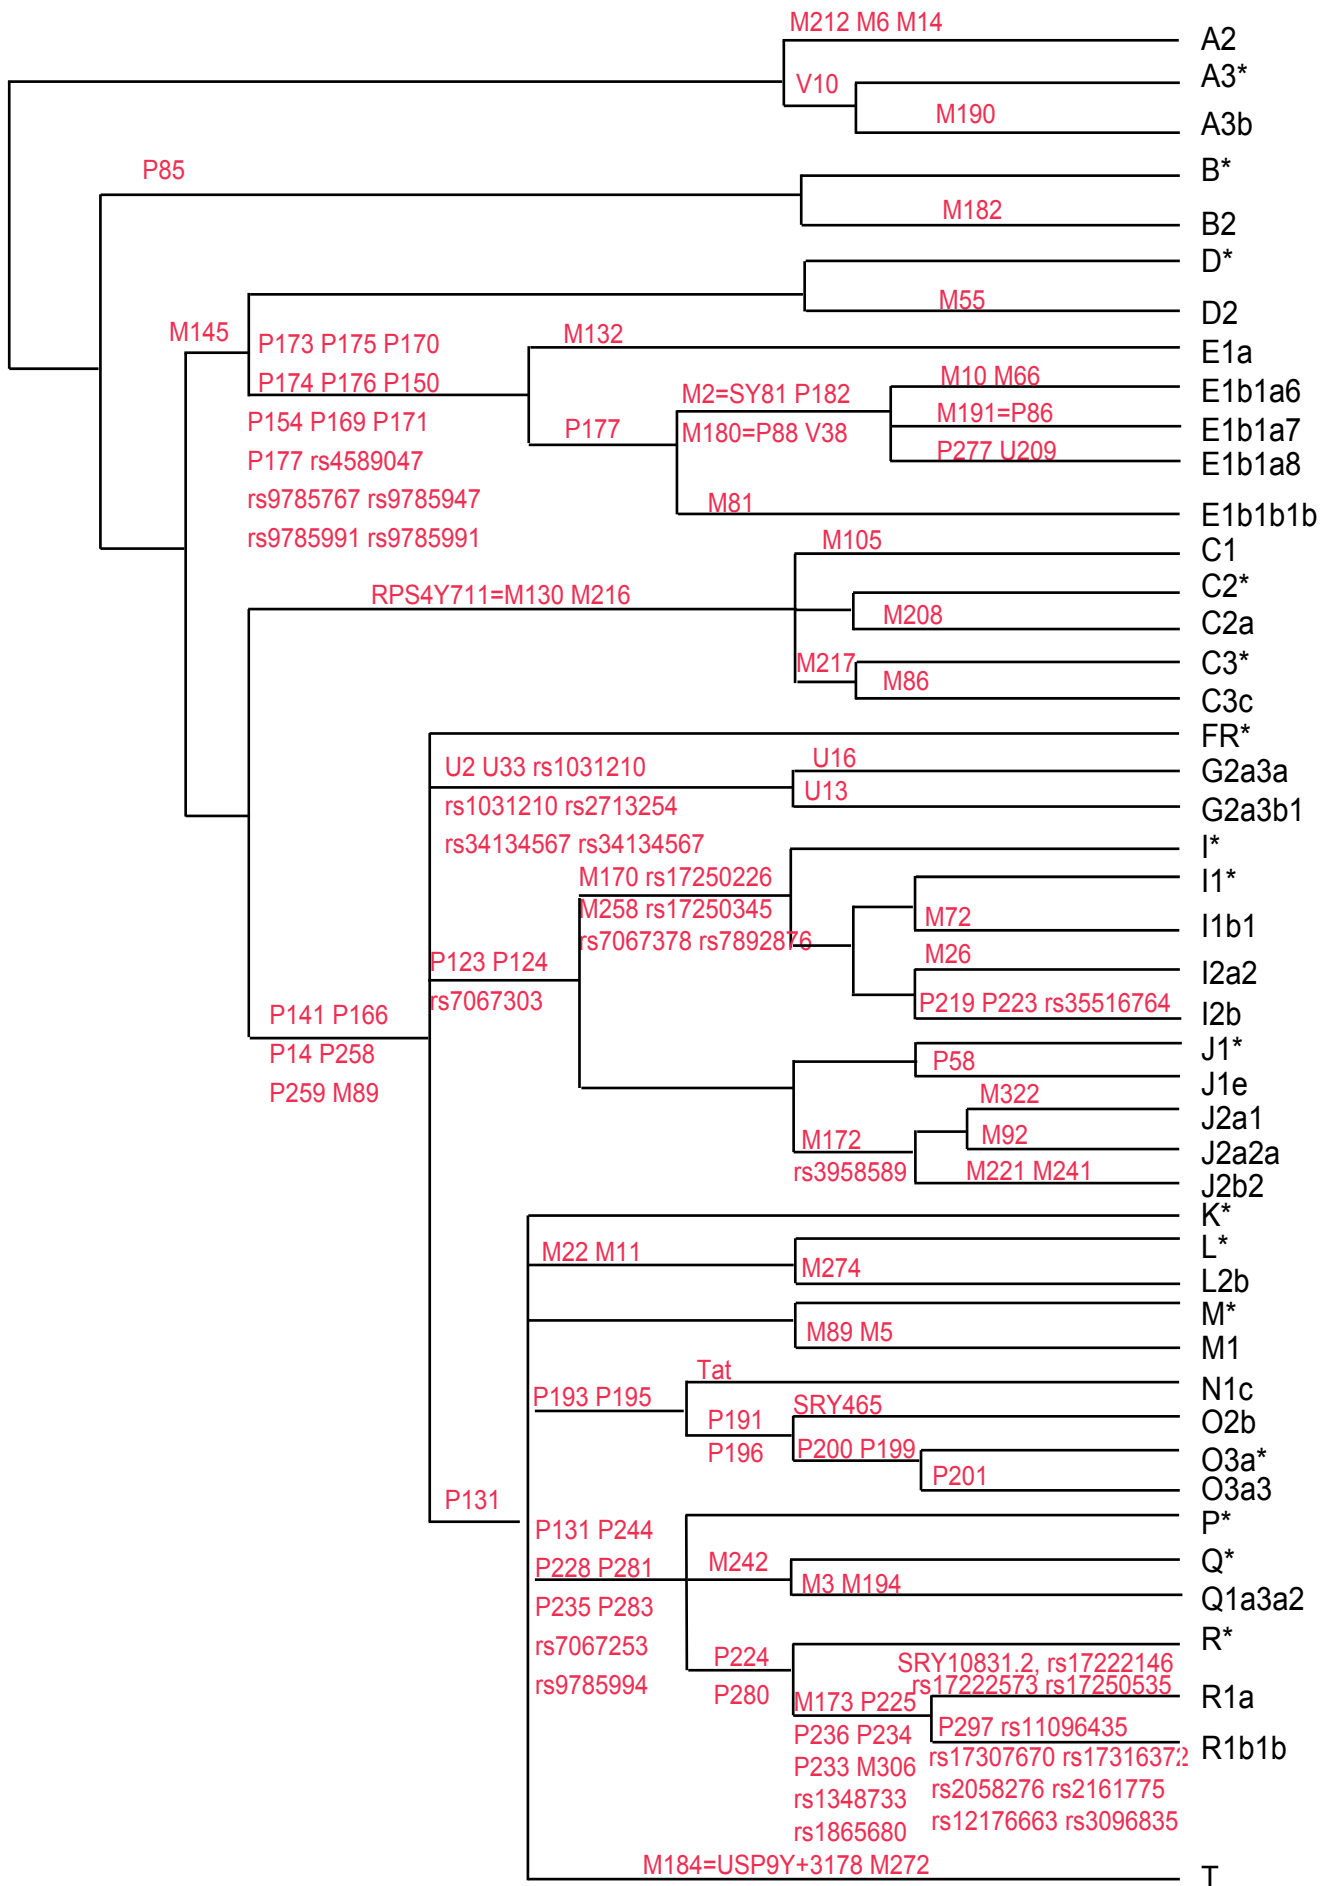

Supplement: 439_2015_1562_MOESM2_ESM.pdf [file 439_2015_1562_MOESM2_ESM.pdf]
